# Supplementary material for: Efficient Co@CoPx core–shell nanochains catalyst for the oxygen evolution reaction
Source: Royal Society of Chemistry journal article supplement (doi:10.1039/c8qi00428e), 2018-01-01
Supplement: c8qi00428e1.pdf [file c8qi00428e1.pdf]

## Supporting Information

### Efficient Catalyst of Co@CoP<sub>x</sub> Core-shell Nanochains for Oxygen Evolution Reaction

*Xiaotao Yuan,<sup>a,‡</sup> Zhe Zhang,<sup>a,‡</sup> Zichao Liu,<sup>a</sup> Xin Wang,<sup>a</sup> Chenlong Dong,<sup>a</sup> Muhammad*

*Sohail Riaz,<sup>a</sup> Fuqiang Huang<sup>a, b, \*</sup>*

<sup>a</sup> State Key Laboratory of Rare Earth Materials Chemistry and Applications, College of Chemistry and Molecular Engineering, Peking University, Beijing 100871, People's Republic of China.

<sup>b</sup> CAS Key Laboratory of Materials for Energy Conversion, Shanghai Institute of Ceramics, Chinese Academy of Sciences, Shanghai 200050, People's Republic of China.

\*Corresponding author: [huangfq@pku.edu.cn](mailto:huangfq@pku.edu.cn)

‡ Xiaotao Yuan and Zhe Zhang contribute equally to this work.

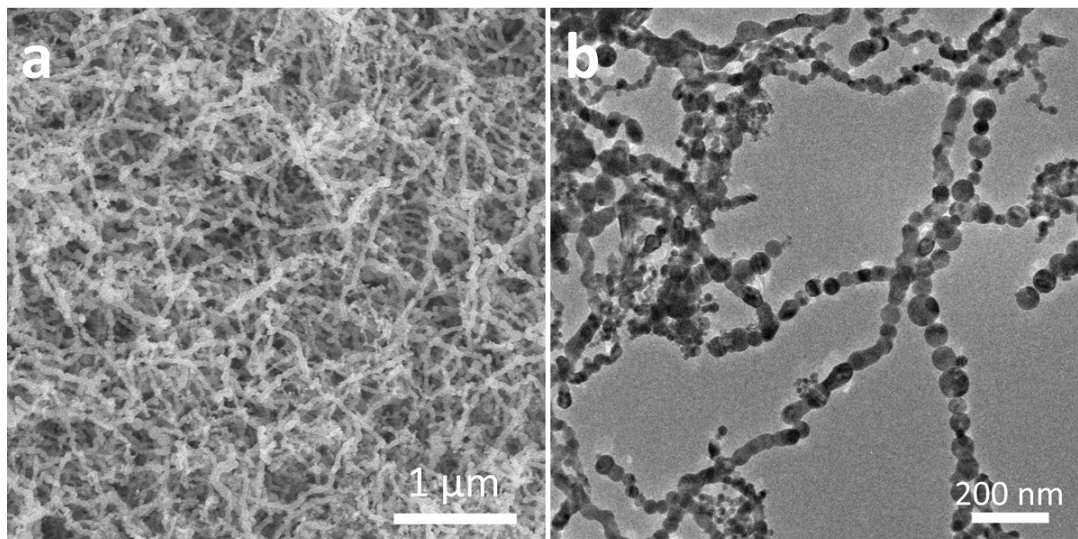

**Figure S1.** (a) SEM image and (b) TEM image of Co nanochains.

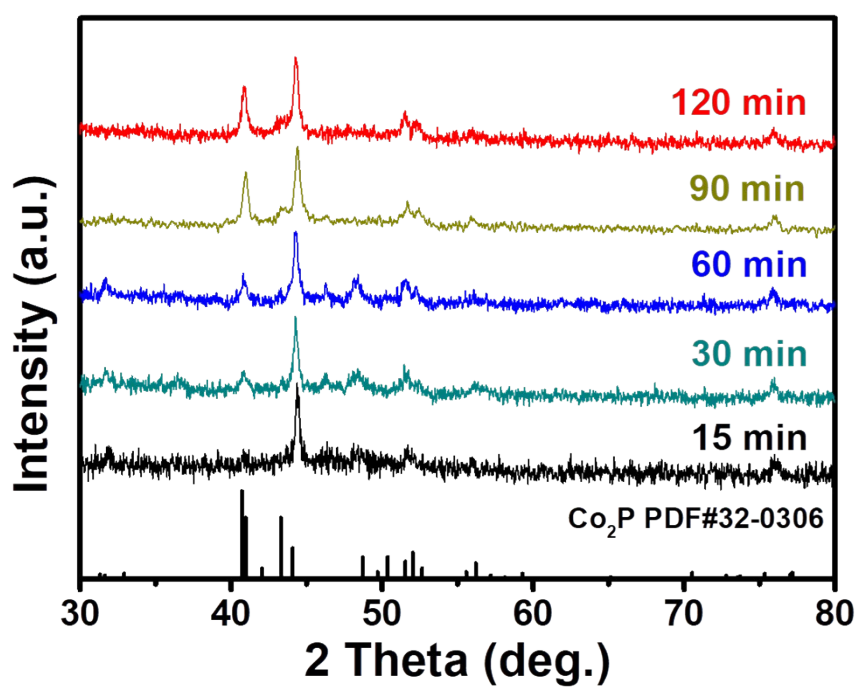

**Figure S2.** XRD patterns of Co@CoP<sub>x</sub> nanochains prepared under different phosphorization time.

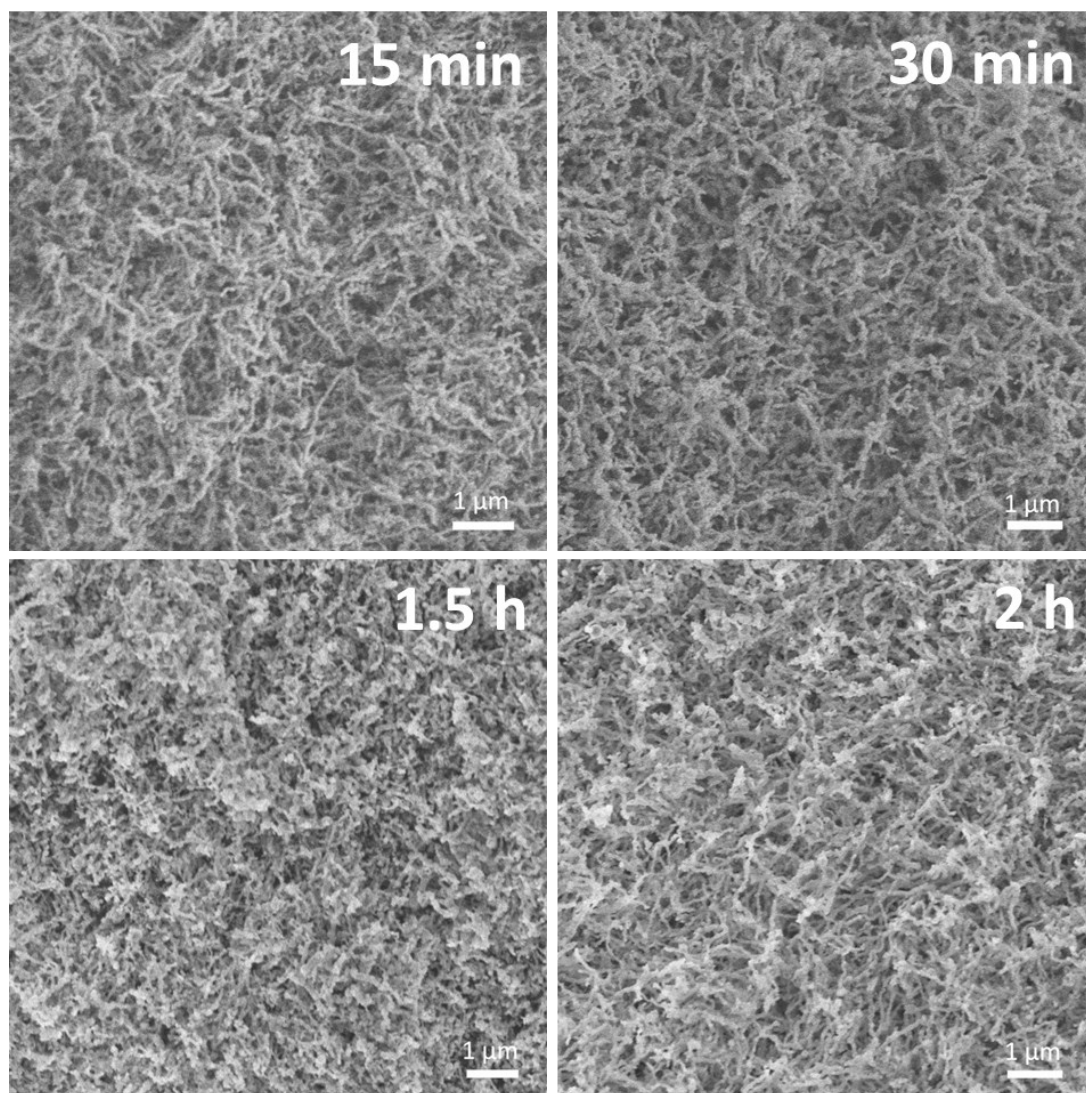

**Figure S3.** SEM images of Co@CoP<sub>x</sub> nanochains prepared under different phosphorization time (a, b) 15 min, (c, d) 0.5 h, (e, f) 1.5 h, (g, h) 2 h.

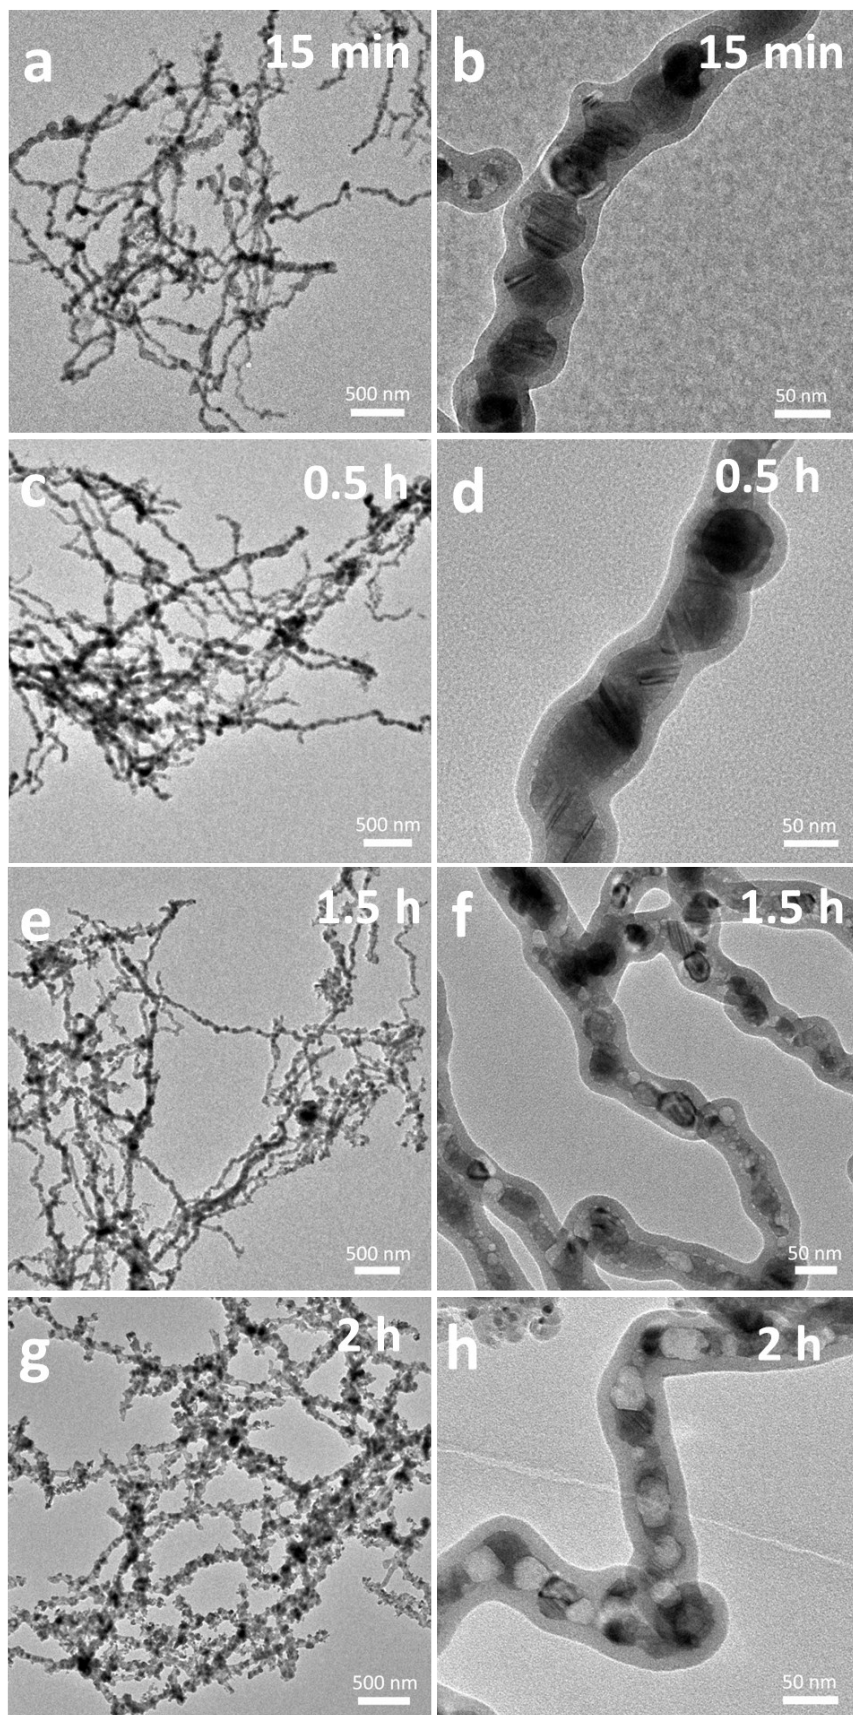

**Figure S4.** TEM images of Co@CoP<sub>x</sub> nanochains prepared under different phosphorization time (a, b) 15 min, (c, d) 0.5 h, (e, f) 1.5 h, (g, h) 2 h.

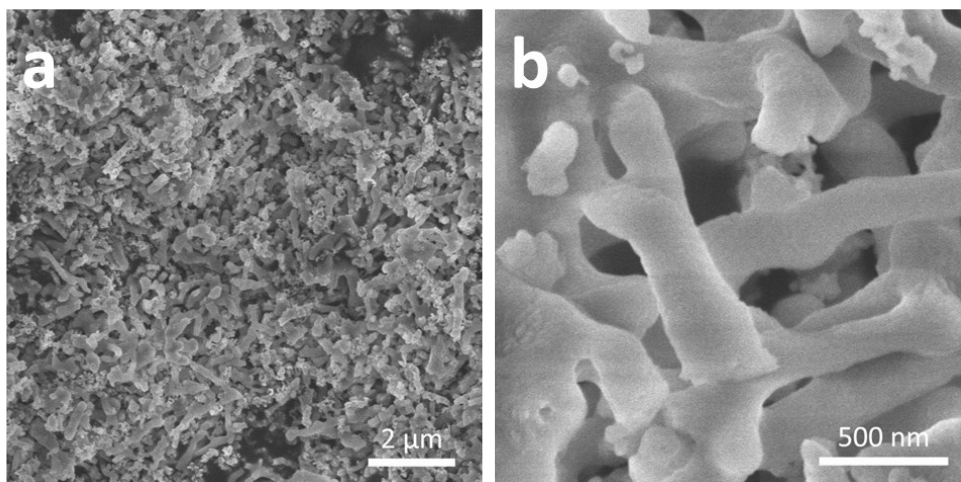

**Figure S5.** SEM images of  $\text{CoP}_x$ .

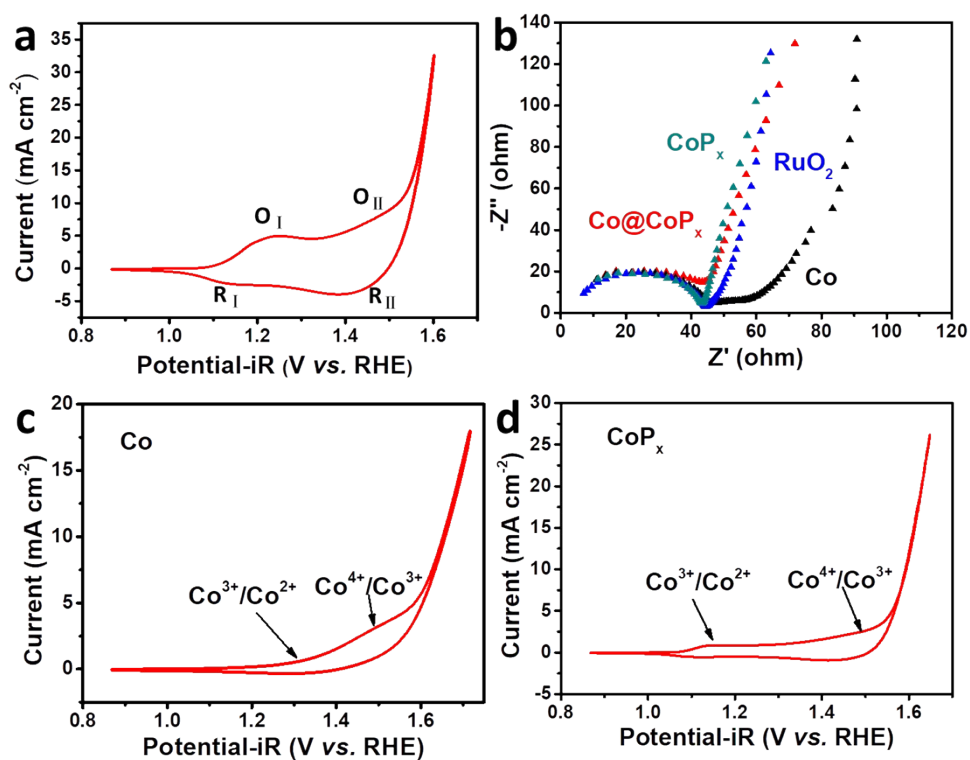

**Figure S6.** (a) Cyclic voltammety curves of  $\text{Co@CoP}_x$  nanochains; (b) Electrochemical impedance spectroscopy (EIS) of  $\text{Co}$ ,  $\text{CoP}_x$ ,  $\text{Co@CoP}_x$  and  $\text{RuO}_2$ . (c) Cyclic voltammety curves of  $\text{Co}$ ; (d) Cyclic voltammety curves of  $\text{CoP}_x$ .

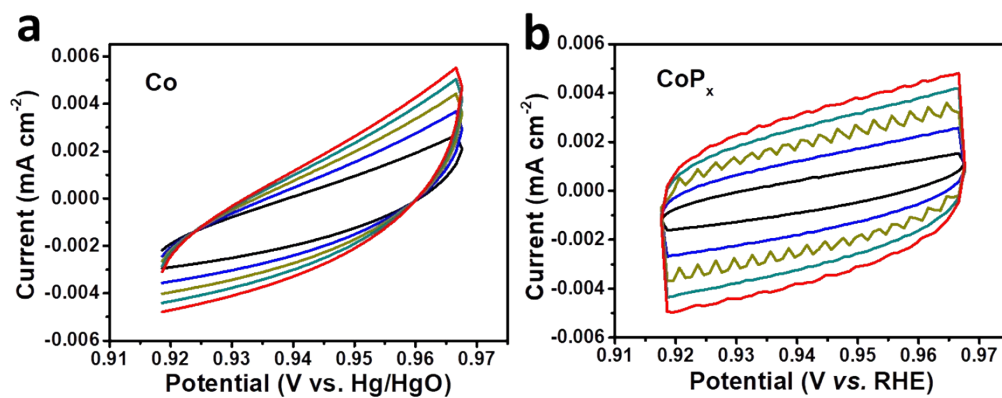

**Figure S7.** Cyclic voltammetry curves of (a) Co nanochains and (b)  $\text{CoP}_x$  in the region where no redox reaction occurs, the scan rate are 10, 8, 6, 4, 2  $\text{mV s}^{-1}$ .

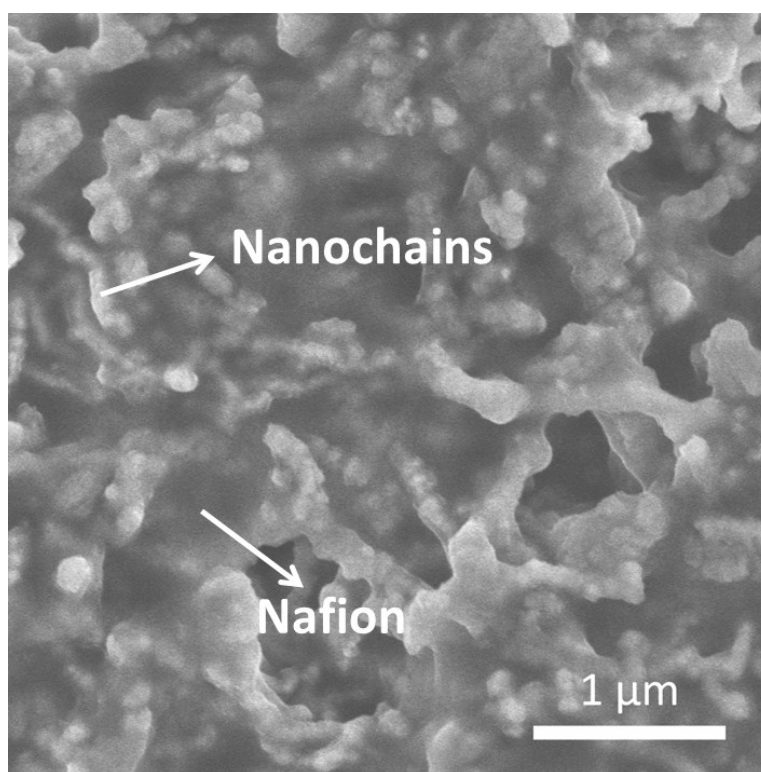

**Figure S8.** SEM image of  $\text{Co@CoP}_x$  after stability test.

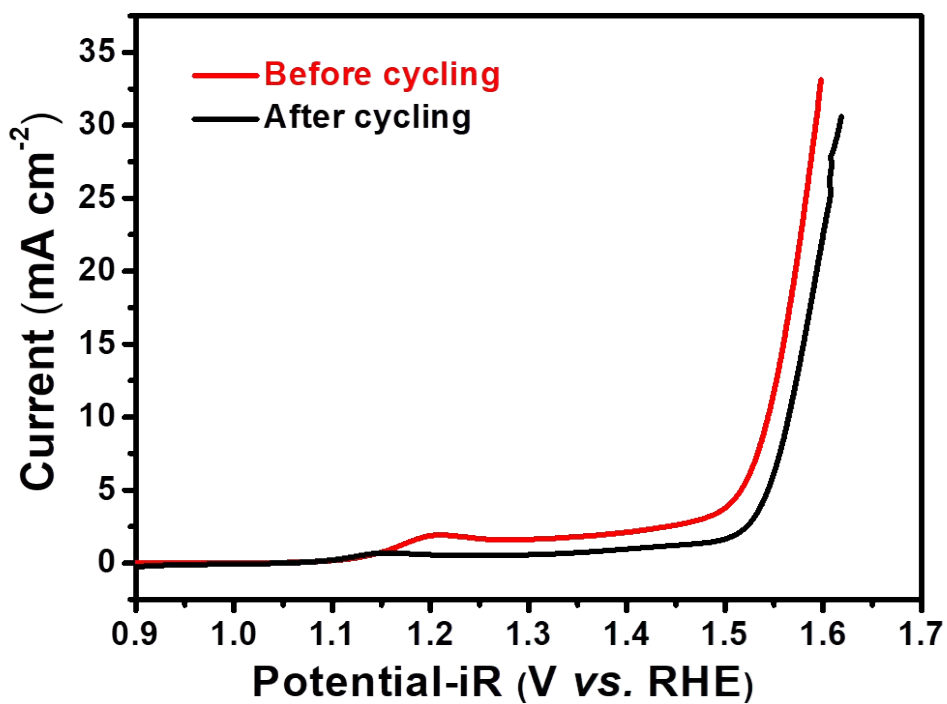

Figure S9. Polarization curves of Co@CoP<sub>x</sub> before and after stability test.

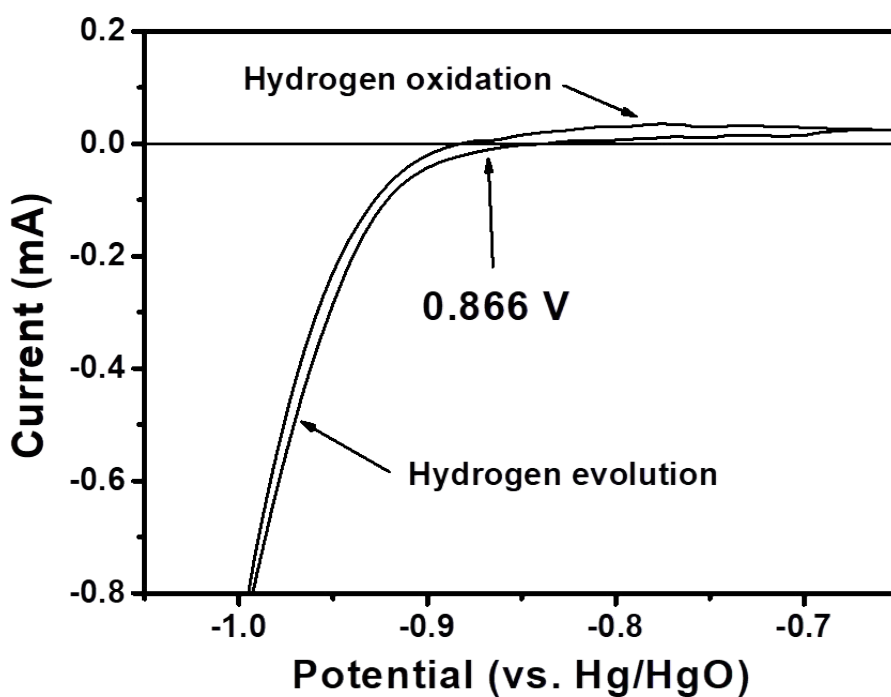

Figure S10. CV curve measured in H<sub>2</sub> saturated 0.1 M KOH for RHE calibration.
